# Supplementary material for: The Health and Nutritional Status of Children (10–18 years) Belonging to Food Insecure Households: The Korea National Health and Nutrition Examination Survey (2012–2019)
Source: MDPI journal article supplement (doi:10.3390/ijerph20176695), 2023-08-31
Supplement: s1 [file s1]

**Table S1.** Difference in Food Group Intake(%) & Individual Food intake(kcal/d) according to food insecurity status.

| Food groups(%)                                                            | Boys            |               |          | Girls           |               |          |
|---------------------------------------------------------------------------|-----------------|---------------|----------|-----------------|---------------|----------|
|                                                                           | FS<br>(n=1,650) | FI<br>(n=221) | <i>p</i> | FS<br>(n=1,500) | FI<br>(n=184) | <i>p</i> |
| Food Group Intake/KDRI(%) <sup>1)</sup>                                   |                 |               |          |                 |               |          |
| Grains                                                                    | 118.6 ± 1.4     | 118.3 ± 4.4   | 0.952    | 111.2 ± 1.6     | 113.4 ± 3.9   | 0.592    |
| Meat, fish, eggs, legumes                                                 | 91.0 ± 2.0      | 89.7 ± 5.3    | 0.827    | 107.9 ± 2.6     | 93.6 ± 6.7    | 0.043    |
| Vegetables                                                                | 59.8 ± 1.6      | 62.8 ± 3.7    | 0.434    | 56.0 ± 1.3      | 55.6 ± 3.5    | 0.925    |
| Fruits                                                                    | 69.8 ± 2.9      | 68.6 ± 10.3   | 0.909    | 126.8 ± 5.1     | 164.2 ± 25.3  | 0.150    |
| Milk and dairy products                                                   | 93.9 ± 2.7      | 90.7 ± 8.1    | 0.701    | 84.8 ± 2.4      | 95.7 ± 10.1   | 0.295    |
| Oils, nuts and sugar                                                      | 63.8 ± 1.8      | 55.0 ± 4.0    | 0.048    | 75.9 ± 2.4      | 68.8 ± 7.2    | 0.353    |
| Individual intake(kcal/d) of<br>subdivide of foods (KNANES) <sup>2)</sup> |                 |               |          |                 |               |          |
| Cereals                                                                   | 1229.8 ± 11.6   | 1283.4 ± 26.4 | 0.062    | 948.7 ± 10.3    | 1003.5 ± 26.7 | 0.049    |
| Potato and starches                                                       | 94.8 ± 4.9      | 81.0 ± 12.4   | 0.308    | 86.5 ± 5.7      | 58.9 ± 11.7   | 0.040    |
| Sugar and sweets                                                          | 59.1 ± 3.7      | 50.2 ± 6.6    | 0.226    | 75.5 ± 4.8      | 77.0 ± 12.0   | 0.905    |
| Legume and its products                                                   | 55.4 ± 2.6      | 69.7 ± 11.4   | 0.217    | 41.4 ± 2.3      | 49.3 ± 7.7    | 0.335    |
| Seeds and its products                                                    | 13.8 ± 1.1      | 10.2 ± 1.5    | 0.053    | 14.7 ± 2.0      | 12.2 ± 3.0    | 0.482    |
| Vegetables                                                                | 65.5 ± 1.6      | 68.2 ± 3.5    | 0.474    | 50.9 ± 1.2      | 50.4 ± 3.0    | 0.876    |
| Mushrooms                                                                 | 4.4 ± 0.5       | 4.5 ± 0.8     | 0.888    | 3.3 ± 0.4       | 3.1 ± 0.8     | 0.872    |
| Fruits                                                                    | 104.6 ± 4.6     | 104.9 ± 13.7  | 0.982    | 103.0 ± 4.2     | 138.3 ± 18.9  | 0.072    |
| Seaweeds                                                                  | 9.0 ± 0.6       | 10.6 ± 1.3    | 0.257    | 8.2 ± 0.7       | 11.6 ± 1.6    | 0.046    |
| Oil and fat(plant)                                                        | 88.4 ± 2.6      | 93.7 ± 6.8    | 0.466    | 71.3 ± 2.6      | 60.7 ± 6.0    | 0.102    |
| Meats and its products                                                    | 361.2 ± 9.5     | 350.6 ± 26.2  | 0.701    | 268.9 ± 7.5     | 255.9 ± 20.7  | 0.558    |
| Eggs                                                                      | 75.9 ± 2.7      | 82.9 ± 6.7    | 0.337    | 65.6 ± 2.3      | 66.5 ± 6.0    | 0.889    |
| Fish and shellfishes                                                      | 63.8 ± 3.0      | 72.5 ± 8.8    | 0.338    | 57.9 ± 2.5      | 38.6 ± 4.7    | <0.001   |
| Milks and dairy products                                                  | 234.5 ± 6.6     | 229.1 ± 20.1  | 0.800    | 212.9 ± 6.0     | 232.5 ± 23.2  | 0.414    |
| Oils and fat(animal)                                                      | 27.0 ± 2.7      | 33.1 ± 6.7    | 0.375    | 22.8 ± 1.9      | 23.5 ± 5.9    | 0.904    |
| Beverages                                                                 | 163.5 ± 6.4     | 138.3 ± 16.9  | 0.170    | 135.7 ± 6.2     | 134.1 ± 24.1  | 0.948    |

Mean ± SE, P values are determined by student's t-test.

1) The average percentage ratio of Food group intake per KDRI recommended food group intake

2) Calorie intake(kcal/d) of individual foods except 4 foods (seasoning, other plant, other animal, alcohol) among 22 foods subdivided by KNANES.

FS: Food security group; FI: Food insecurity group, defined as a score of ≥3 according to the 18-item household food security assessment questionnaire.
